# Supplementary material
Source: PubMed Central journal article supplement (PMC3139382)

**Figure S1. Dose-dependent inhibition of CK2 catalytic activity by TBB and Emodin.**

Cell lysates of MEFs were immunoprecipitated with anti-CK2 $\alpha$  antibody, and assayed for CK2 activity in the presence of different concentrations of TBB (5-100  $\mu$ M) (A) or Emodin (5-100  $\mu$ M) (B). The value of the untreated sample was arbitrarily set as 100%. Experiments were performed in triplicate, and error bars show  $\pm$  S.D..

**Figure S2. Co-immunoprecipitation of CK2 with endogenous JAK2.** Lysates of MEFs (A-B), MDA-MB-231 (C) and primary astrocytes (D) were immunoprecipitated (IP) with CK2 $\alpha$ , JAK2, normal goat IgG (G-IgG, negative control), or normal rabbit IgG (R-IgG, negative control) as indicated, and then immunoblotted (IB) with the indicated antibodies.

**Figure S3. CK2 does not associate with IFNGR1.** Lysates of  $\gamma$ 2A-JAK2 cells were immunoprecipitated with anti-IFNGR1 antibody, and immunoblotted with the indicated antibodies.

**Figure S4. Inhibition of JAK2 by P6 does not affect CK2 catalytic activity.** MEFs were treated with different concentrations of P6 (0.1-10  $\mu$ M). Cell lysates were

immunoprecipitated with anti-CK2 $\alpha$  antibody, and assayed for CK2 activity. Experiments were performed in triplicate, and error bars show  $\pm$  S.D..

**Figure S1**

**A**

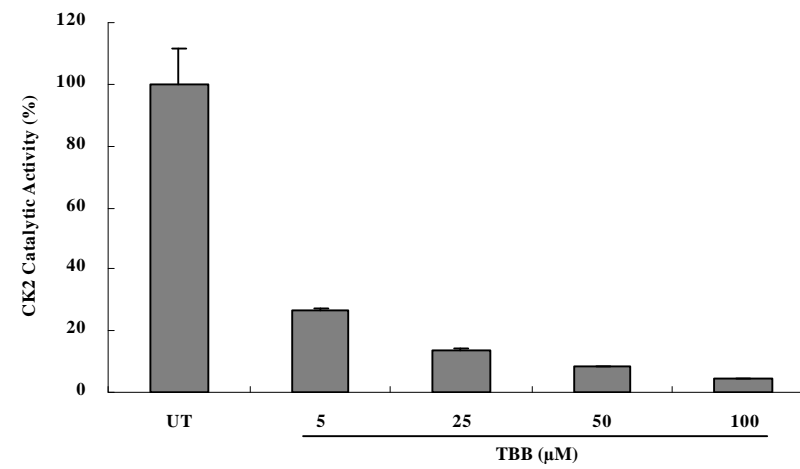

**B**

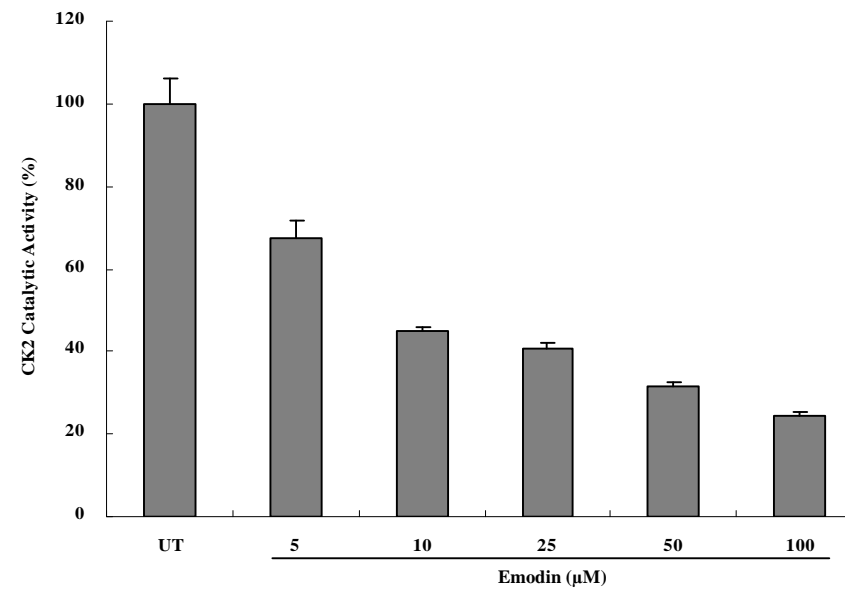

**Figure S2**

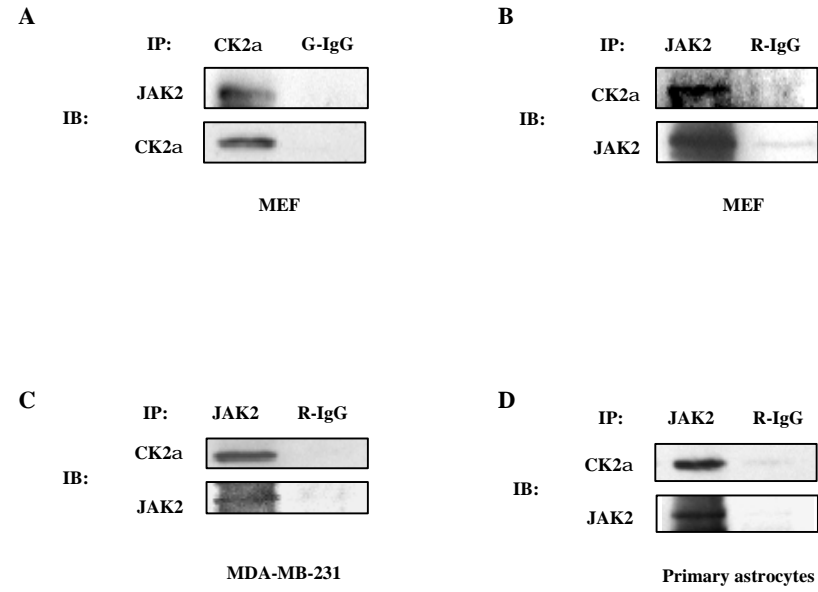

**Figure S3**

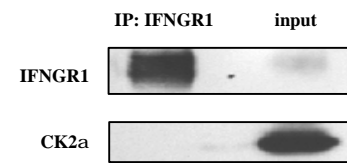

**Figure S4**

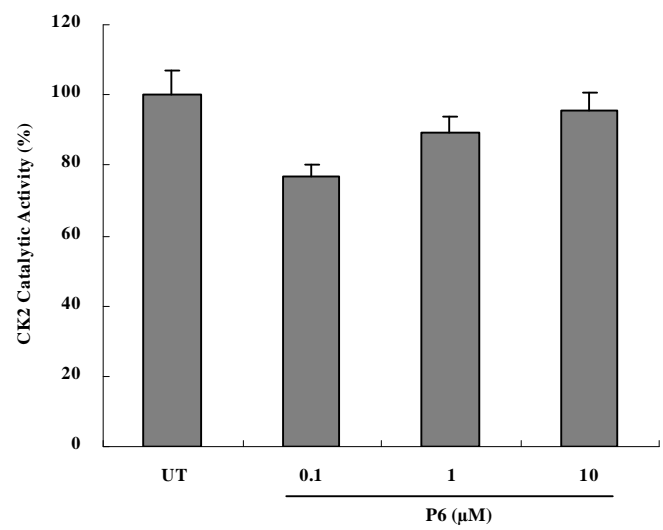

Supplement: supp_blood-2010-01-266320_blood-2010-01-266320-1.pdf [file supp_blood-2010-01-266320_blood-2010-01-266320-1.pdf]
